# Supplementary material for: ARF6-dependent endocytic trafficking of the Interferon-γ receptor drives adaptive immune resistance in cancer
Source: PubMed Central journal article supplement — bioRxiv. 2023 Oct 2:2023.09.29.560199. Preprint. [Version 1] doi: 10.1101/2023.09.29.560199 (PMC10592860; doi:10.1101/2023.09.29.560199), 2023-10-02
Supplement: NIHPP2023.09.29.560199V1-supplement-1.pdf [file NIHPP2023.09.29.560199V1-supplement-1.pdf]

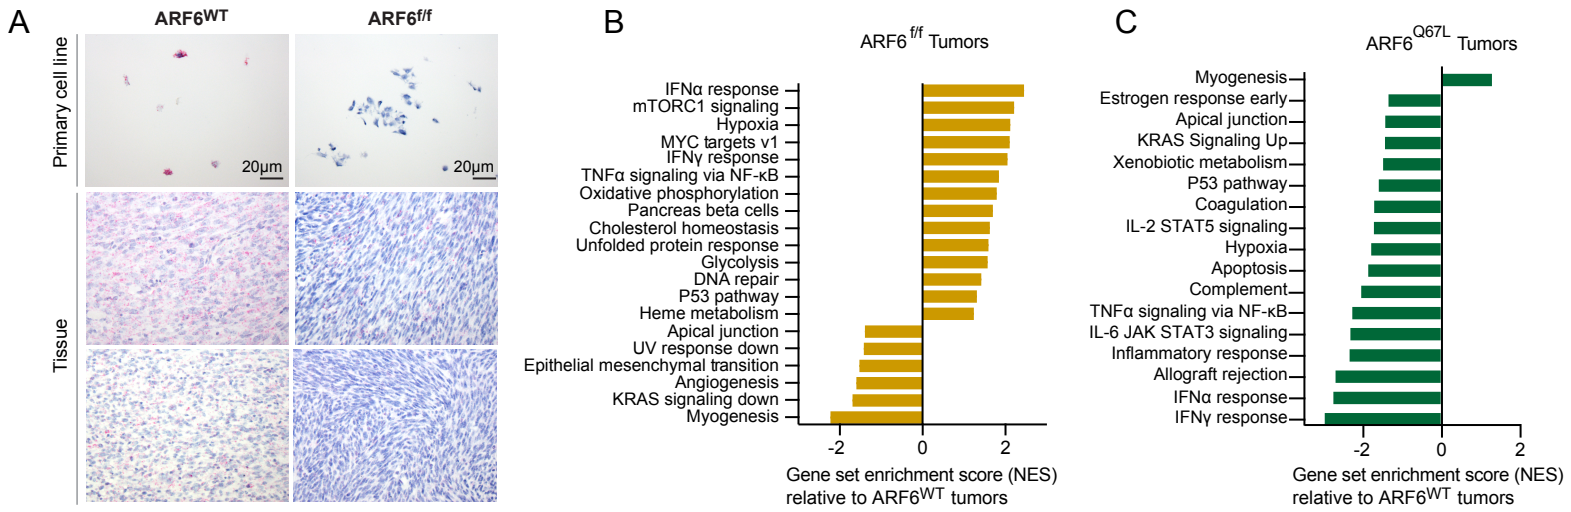

**Figure S1: *Arf6* expression and ARF6-dependent gene expression pathways in murine tumors, related to Figures 1, 2.**

**(A)** In situ hybridization detection of *Arf6* mRNA (pink). Left panels show expected diffuse signal. Right panels show expected loss of signal. Right middle panel shows representative low-level heterogeneous *Arf6* signal in murine tumor 19835, consistent with the low level of ARF6 detected by Western blot for the 19835 primary tumor cell line (see Figure 1G). **(B and C)** Bulk tumor transcriptomes (RNAseq) with significantly enriched gene sets (MSigDB Hallmark) in ARF6<sup>ff</sup> **(B)** and ARF6<sup>Q67L</sup> **(C)** tumors compared to ARF6<sup>WT</sup> control tumors.

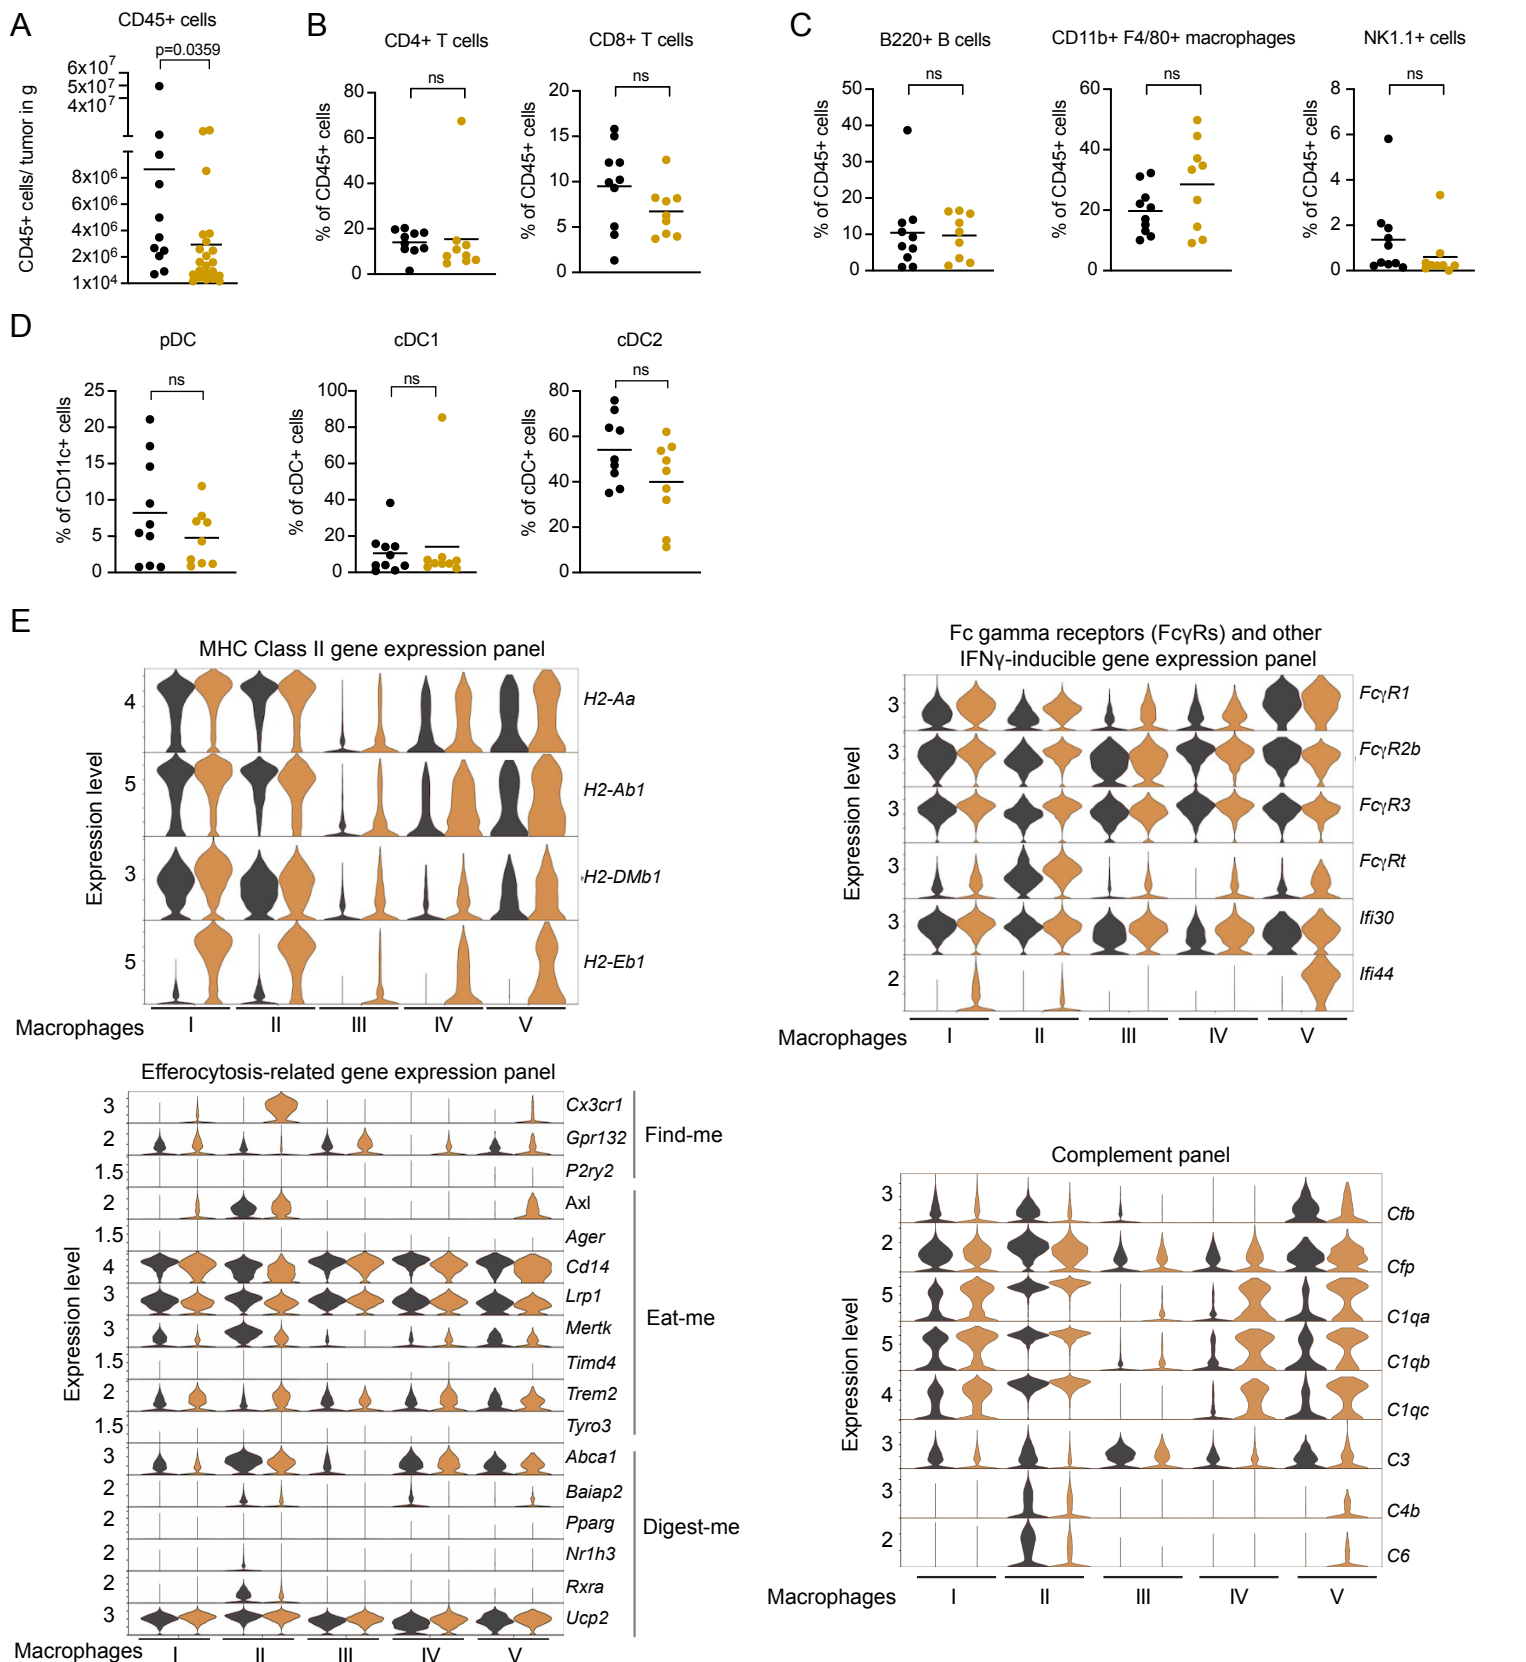

**Figure S2: Immune profiling of tumor microenvironment, related to Figure 3.**

(A) The absolute numbers of CD45<sup>+</sup> cells per gram of tumor. (B) Fractions of CD4<sup>+</sup> and CD8<sup>+</sup> T cells in CD45<sup>+</sup> cells. (C) Fractions of B220<sup>+</sup> B cells, CD11b<sup>+</sup> F4/80<sup>+</sup> macrophages, and NK1.1<sup>+</sup> cells in CD45<sup>+</sup> cells. (D) Fractions of plasmacytoid dendritic cells (pDC) and conventional dendritic cell subsets (cDC1 and cDC2). (A-D) Graphs represent mean. Two-tailed Mann-Whitney t-test. (E) Expression of IFNγ-inducible genes related to antigen presentation (MHC Class II), phagocytosis (FcγR and other genes), efferocytosis-related genes and Complement genes, across different subtypes of macrophages. A comprehensive list of adjusted p-values, obtained from Seurat's Wilcoxon Rank Sum test for differentially expressed genes, is provided in Table S2.

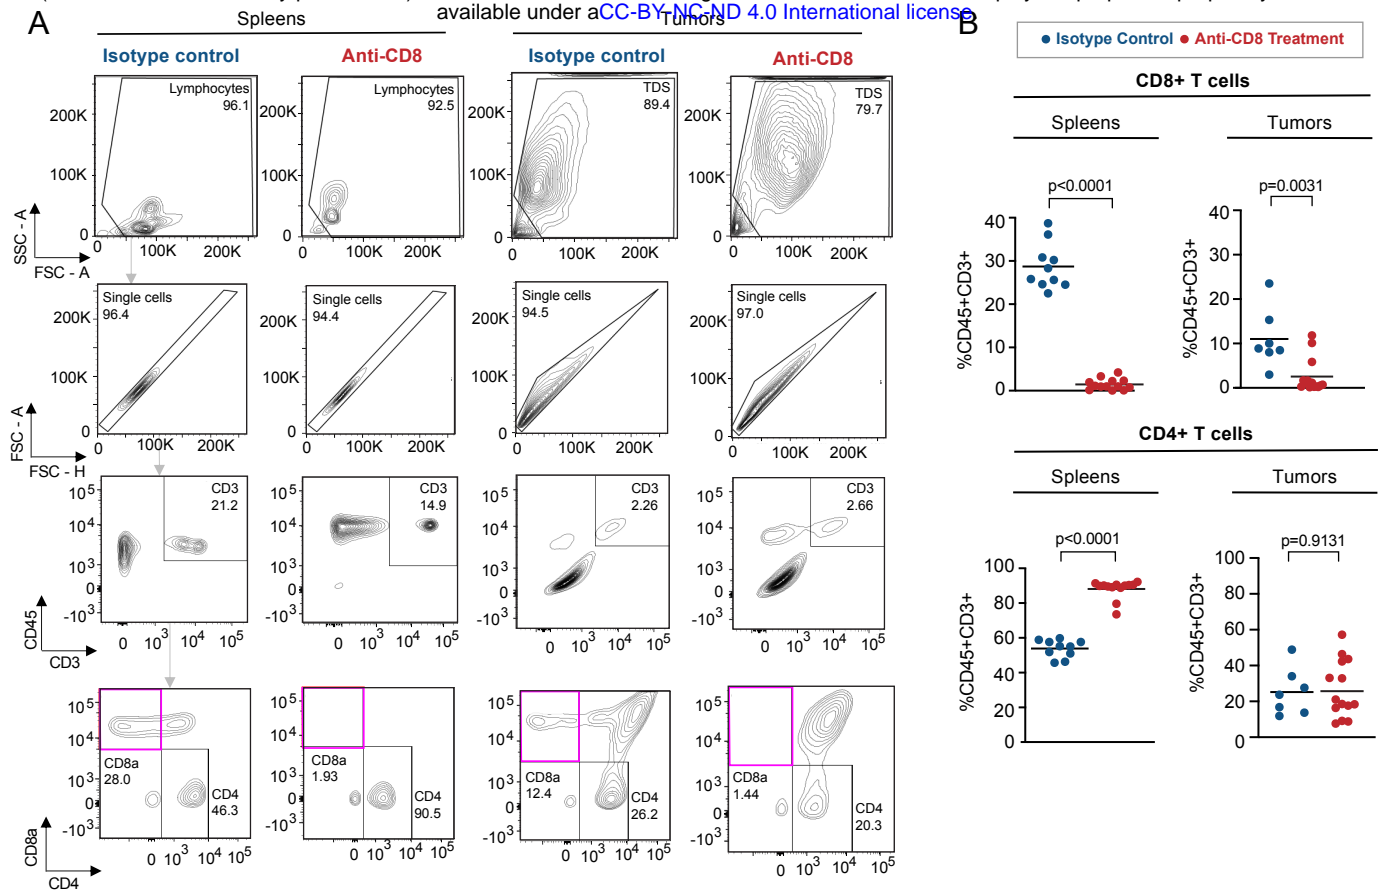

**Figure S3: Efficiency of CD8 T cell depletion, related to Figure 3.**

**(A and B)** Quantitation of T cells by flow cytometry **(A)** and graph representing the mean **(B)** in spleens and tumors of mice treated with isotype control (IgG2b) or anti-CD8 antibody. Two-tailed Mann-Whitney t-test.

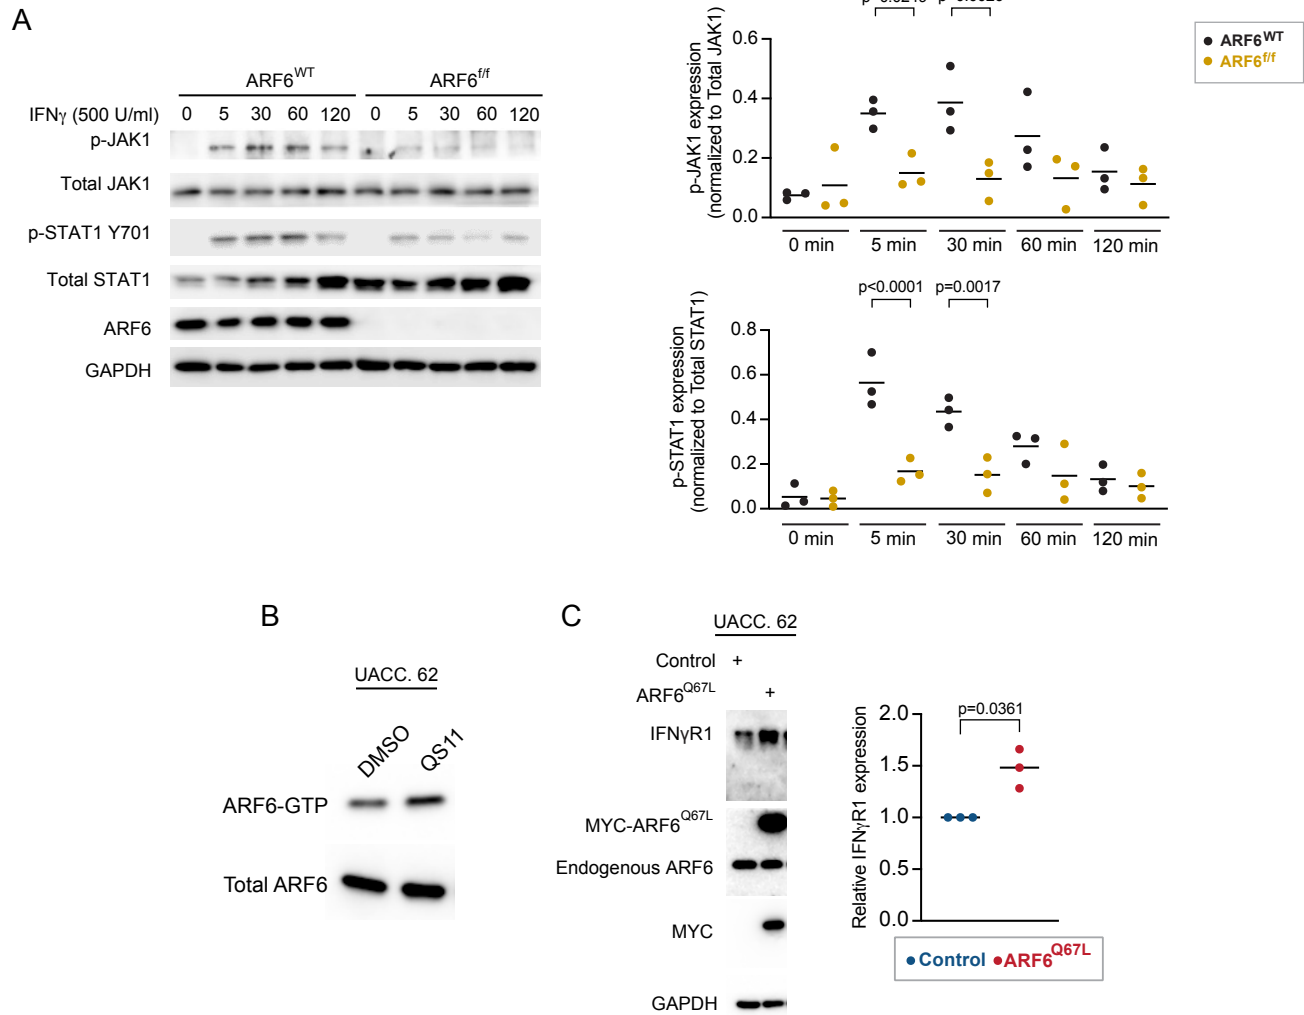

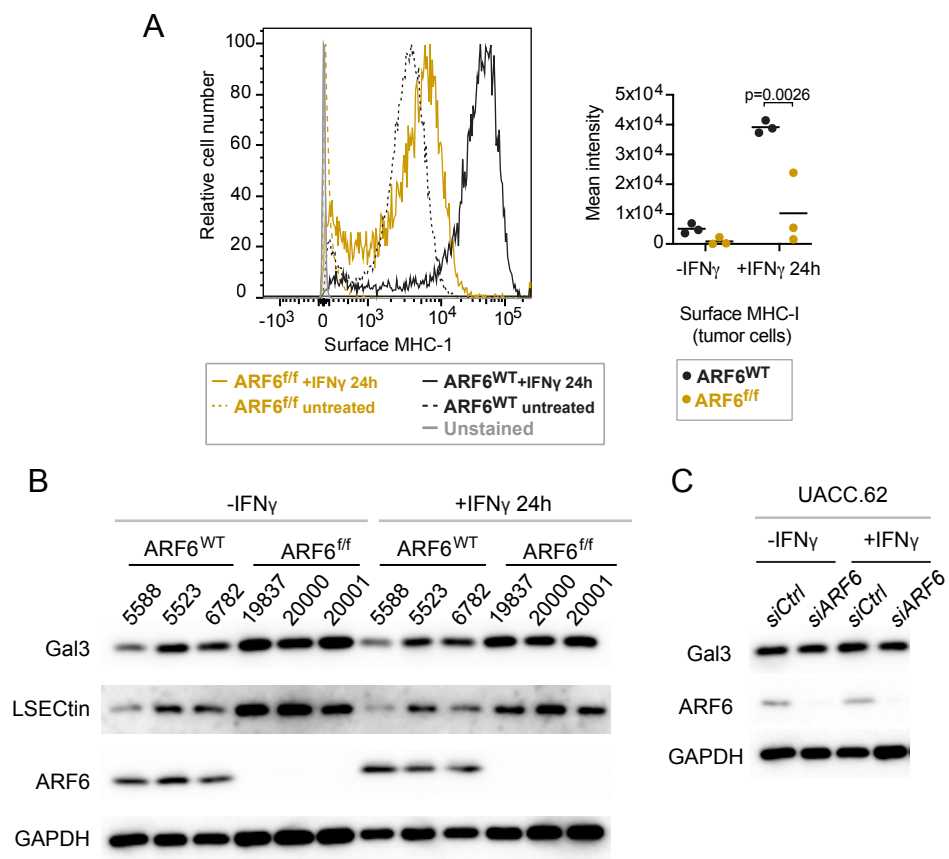

**Figure S5: Expression of MHC-1 and LAG3 ligands, related to Figure 5.**

**(A)** Flow cytometric detection of tumor cell surface MHC-I expression, n=3 independent cell lines of each genotype. Two-way ANOVA test. **(B)** Western blot detection of Galectin3 (Gal3) and LSEctin in murine melanoma, n=3 independent cell lines of each genotype. **(C)** Western blot detection of Gal3 in UACC.62 cells without or with ARF6 knockdown, n=3 biological replicates.

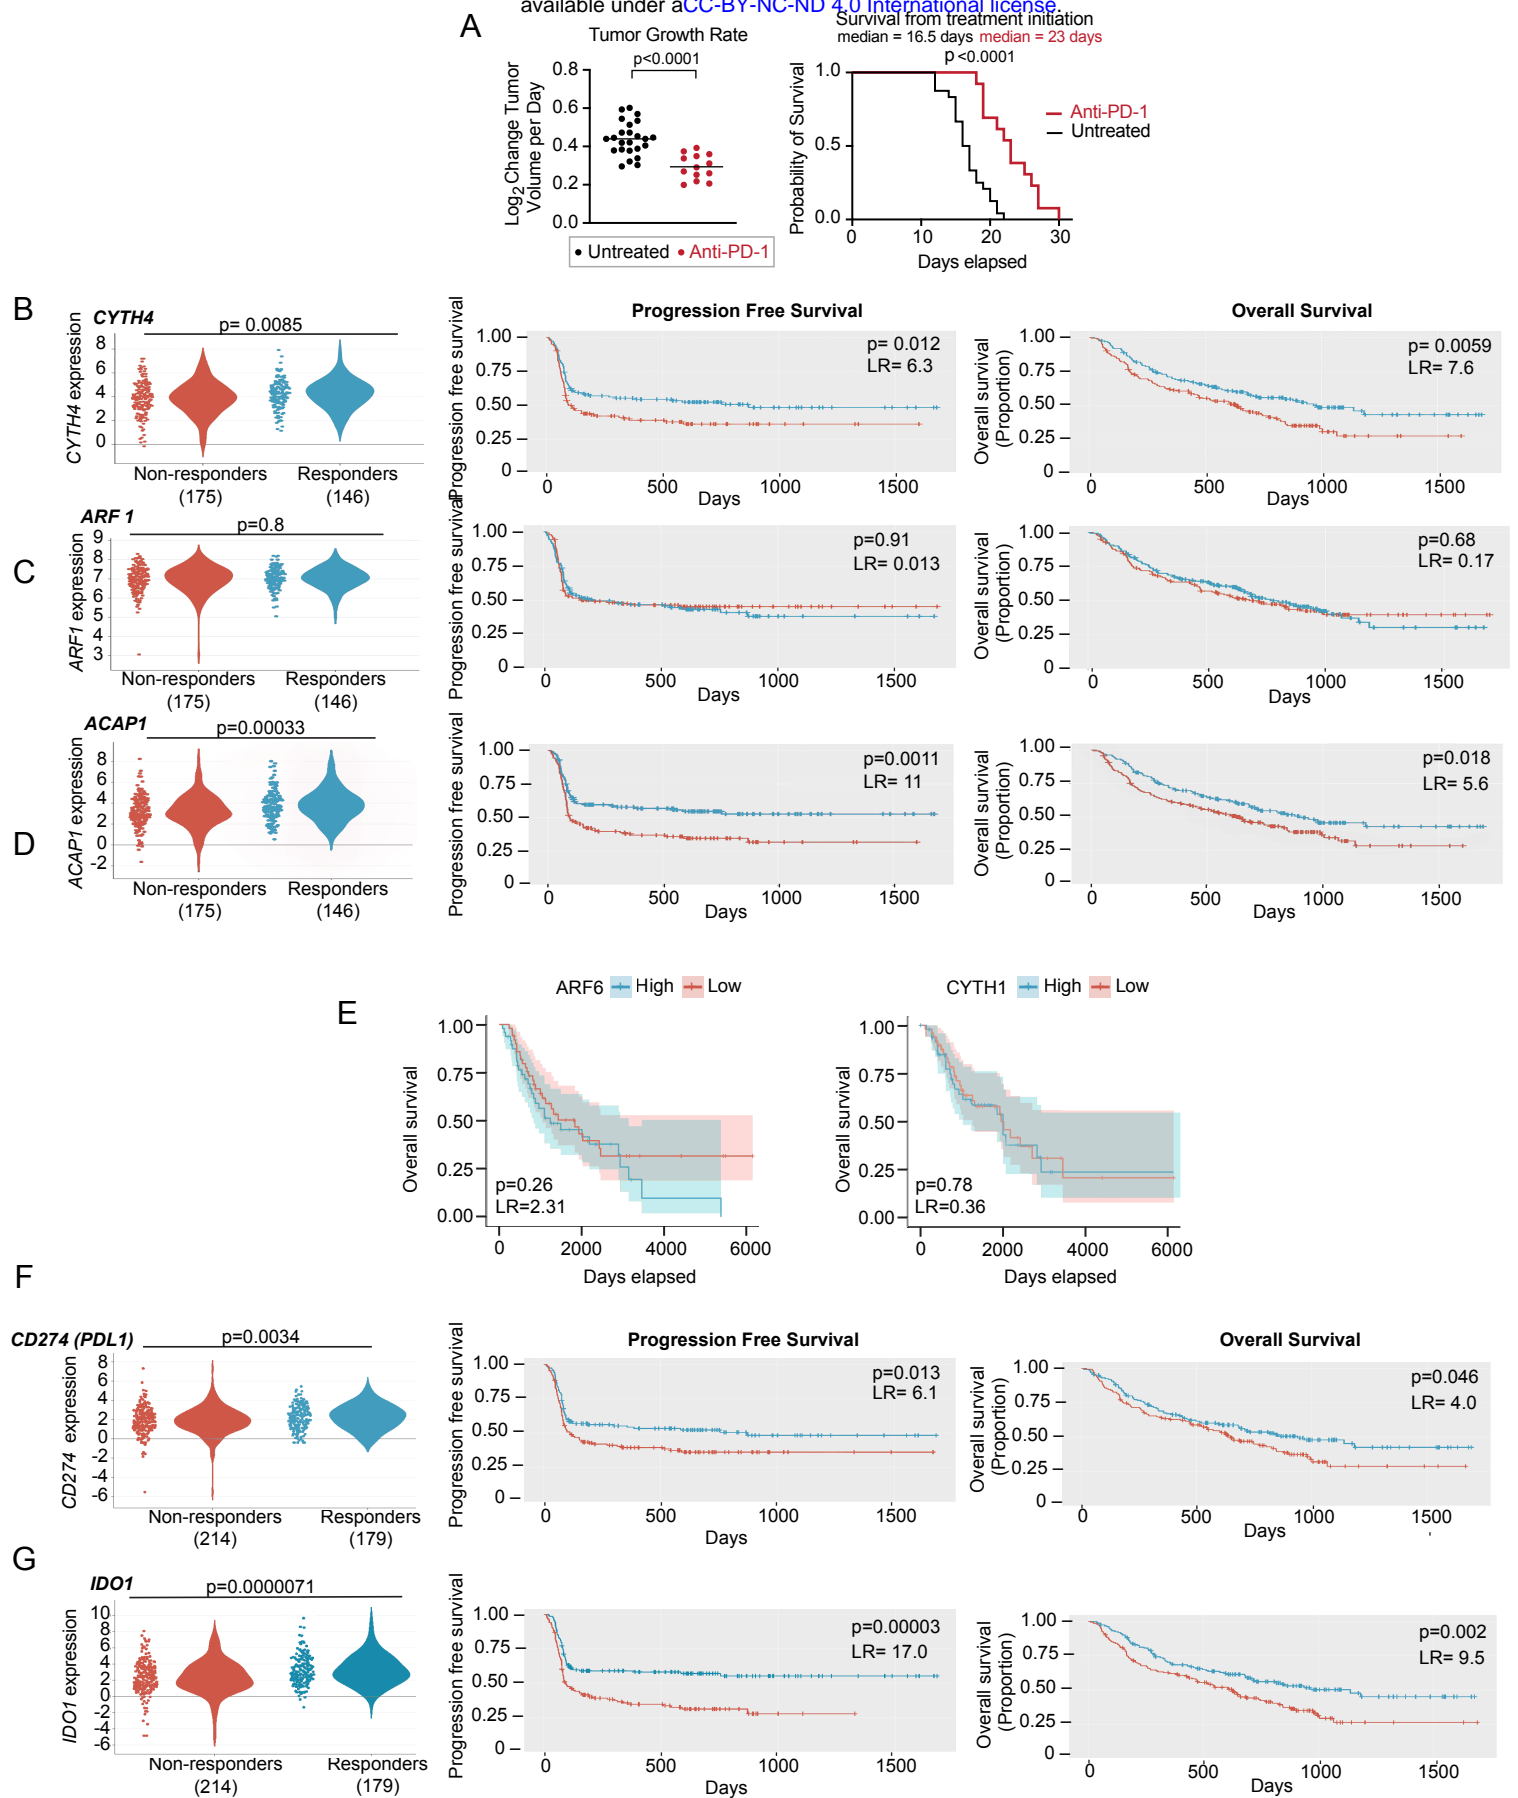

**Figure S6: ICB treatment outcomes, related to Figure 6.**

(A) Systemic anti-PD-1 treatment initiated in *Arf6*<sup>WT</sup> mice with established tumors (up to 5mm in greatest dimension, 27-72mm<sup>3</sup>). Untreated controls (n=24), anti-PD-1 (n=13). Rate of tumor growth measured from initiation of treatment, Welch's t-test. Survival (primary tumor reached 2cm) from initiation of treatment, Log-rank (Mantle-Cox) test. (B-D) Association of ICB treatment outcome in melanoma patients with mRNA levels of *CYTH4* (B), *ARF1* (C) and *ACAP1* (D) in transcriptomes of pretreatment melanoma biopsies (CancerImmu expression analysis). (E) Lack of association of *ARF6* and *CYTH1* expression (tumor) with survival of non-ICB treated melanoma patients (TCGA, n=163). (F-G) Association of ICB treatment outcome in melanoma patients with mRNA levels of *CD274* (F), *IDO1* (G) in transcriptomes of pretreatment melanoma biopsies, CancerImmu expression analysis, aggregated data from n=10 queried melanoma clinical studies, adjusted p-values, Benjamini and Hochberg procedure, LR= likelihood ratio (df=1).
